# Supplementary material for: Case—Miller Pain Treatment Center
Source: Atypon-hosted journal article supplement (doi:10.1287/ited.2017.0176cs), 2017-05-01
Supplement: ited.2017.0176cs-sm.xlsx [file ited.2017.0176cs-sm.xlsx]

## Sheet: Exhibit2
Record	Registration	Vitals	Physicians Assistant	Check Out
1	9	3	15	1
2	4	2	26	5
3	9	3	47	4
4	8	3	24	10
5	4	4	56	9
6	3	1	21	7
7	2	3	12	3
8	1	3	19	4
9	6	3	9	5
10	8	3	21	1
11	4	3	14	1
12	4	3	13	6
13	4	2	21	3
14	11	2	26	2
15	2	3	32	4
16	3	3	25	8
17	7	5	23	2
18	3	4	18	2
19	3	1	42	6
20	3	2	16	3
21	2	5	22	2
22	4	5	19	4
23	1	4	25	3
24	1	2	14	5
25	5	2	17	3
26	5	4	28	1
27	4	3	15	1
28	2	3	18	2
29	2	3	14	1
30	3	3	39	10
31	2	3	17	5
32	5	3	11	3
33	2	5	13	4
34	2	4	21	3
35	5	2	23	3
36	3	2	11	8
37	2	5	13	6
38	5	5	51	1
39	6	14	26	1
40	6	3	32	2
41	7	2	6	7
42	17	5	14	13
43	3	5	60	5
44	6	3	27	19
45	5	3	41	5
46	3	4	43	8
47	3	4	68	5
48	3	6	13	5
49	7	2	20	5
50	10	5	22	1
51	9	4	23	3
52	5	4	58	12
53	2	5	21	1
54	4	4	47	3
55	6	4	29	2
56	3	4	25	4
57	2	3	19	4
58	2	2	13	10
59	8	3	16	4
60	5	3	17	1
61	2	6	14	4
62	5	2	17	12
63	5	4	76	7
64	3	5	22	8
65	4	3	21	7
66	1	4	10	2
67	5	2	8	6
68	4	4	27	7
69	4	4	11	8
70	3	2	20	5
71	3	2	46	3
72	5	3	14	4
73	5	7	14	3
74	3	3	12	2
75	4	3	16	2
76	3	3	28	7
77	5	3	15	3
78	1	3	9	3
79	5	3	16	2
80	2	4	18	5
81	13	2	18	4
82	3	3	36	1
83	4	3	12	4
84	2	6	21	3
85	5	2	25	3
86	8	2	32	15
87	8	3	10	8
88	2	3	19	4
89	2	2	19	9
90	6	7	7	1
91	4	4	5	3
92	3	3	12	5
93	1	10	9	6
94	5	1	9	5
95	1	3	34	5
96	2	3	16	6
97	4	3	7	4
98	6	3	21	6
99	3	5

## Sheet: Exhibit3
	Record	Attending Time New Patients Private Practice	Attending Time Return Patients Private Practice
	1	12	15
	2	27	14
	3	16	15
	4	15	30
	5	18	16
	6	29	30
	7	29	24
	8	20	14
	9	33	14
	10	30	14
	11	29	4
	12	35	14
	13	15	11
	14	33	17
	15	39	26
	16	23	22
	17	10	15
	18	35	10
	19	30	30
	20	20	31
	21	30	20
	22	20	11
	23	55	12
	24	34	15
	25	28	23
	26	25	27
	27	37	17
	28	28	23
	29	35	20
	30	16	25
	31	60	18
	32	45	7
	33	23	9
	34	25	10
	35	30	17
	36	39	5
	37	29	15
	38	24	12
	39	26	5
	40	29	6
	41	40	36
	42	30	26
	43	27	24
	44	31	14
	45	40	18
	46	21	20
	47	17	5
	48	43	23
	49	45	13
	50	31	4
	51	56	15
	52	25	11
	53	55	15
	54	21	18
	55	28	6
	56	99	10
	57	16	22
	58	28	25
	59	31	11
	60	41	6
	61	28	17
	62	23	17
	63	41	27
	64	41	27
	65	40	5
	66	30	17
	67	28	14
	68	45	15
	69	39	15
	70	33	15
	71	16	26
	72	25	27
	73	60	9
	74	40	23
	75	23	30
	76	17	14
	77	30	20
	78	40	14
	79	31	30
	80	45	23
	81	40	15
	82	29	18
	83	29	16
	84	35	14
	85	23	26
	86	25	30
	87	39	30
	88	16	5
	89	20	7
	90	31	15
	91	30	30
	92	29	15
	93	35	11
	94	23	7
	95	25	22
	96	12	4
	97	35	16
	98	25	4
	99	29	22

## Sheet: Exhibit4
Record	Appointment Time Minus Arrival Time Before Policy Change	Appointment Time Minus Arrival Time After Policy Change
1	0	-21
2	-13	-23
3	-40	-15
4	-20	-38
5	-10	-23
6	-5	-5
7	-10	-2
8	-30	-15
9	-18	-36
10	-1	-20
11	-34	-30
12	-2	-36
13	-10	-10
14	-10	-49
15	-31	-37
16	-16	-53
17	-60	-52
18	-30	-45
19	-15	-24
20	-29	-34
21	4	-18
22	-36	-29
23	-35	2
24	-26	-29
25	-35	-17
26	-26	-35
27	-4	-29
28	-130	-32
29	-50	-35
30	-26	-30
31	21	0
32	-11	-41
33	-17	-17
34	-14	-35
35	-52	-32
36	-35	-18
37	5	-44
38	40	-15
39	-15	22
40	-53	-46
41	-30	-17
42	-25	-15
43	-4	-10
44	-22	-34
45	-11	-39
46	-22	-35
47	-14	-20
48	-46	-90
49	-10	-45
50	40	-25
51	-18	-18
52	-30	-25
53	-44	-42
54	-6	-15
55	-16	-20
56	-15	-17
57	-70	-19
58	-22	-8
59	-7	-5
60	2	-29
61	-30	-24
62	-5	0
63	-45	-24
64	17	-24
65	-29	-15
66	-61	-26
67	-45	-15
68	-31	-56
69	-4	-20
70	-30	-14
71	-32	-21
72	-37	-17
73	-46	-35
74	-50
75	5
76	-104
77	-34
78	-55
79	-3
80	-65
81	-23
82	-16
83	-15
84	-30
85	-8
86	-15
87	-30
88	-10
89	-57
90	-12
91	0
92	-85
93	-10
94	-25
95	-32
96	-40
97	-18
98	-10
99	-15
100	-25

## Sheet: Exhibit6
Record	Resident Review	Resident & Patient	Teach	Resident & Attending
1	1	27	3	14
2	5	17	8	5
3	7	9	3	7
4	0	17	2	1
5	6	27	7	9
6	2	13	5	8
7	4	32	5	10
8	4	15	3	5
9	9	17	12	7
10	3	10	5	13
11	23	33	6	5
12	34	20	7	13
13	2	13	4	2
14	3	11	4	6
15	18	6	6	7
16	5	14	3	8
17	10	17	3	7
18	22	6	7	19
19	23	30	8	8
20	10	48	7	8
21	4	7	2	10
22	3	30	22	7
23	15	11	16	2
24	4	17	8	4
25	5	21	10	11
26	10	22	6	9
27	17	4	6	10
28	6	24	6	11
29	12	20	9	9
30	17	21	10	13
31	14	6	1	30
32	4	19	4	15
33	9	11	27	5
34	15	11	7	17
35	3	16	7	11
36	4	31	3	13
37	6	28	7	29
38	16	8	4	29
39	16	8	4	12
40	11	13	16	9
41	4	8	17	13
42	11	35	6	8
43	5	12	1	16
44	18	16	9	8
45	8	12	3	12
46	9	22	6	4
47	3	18	10	10
48	4	14	3	16
49	6	15	17	8
50	6	14	6	17
51	10	10	6	17
52	4	29	3	11
53	27	28	23	15
54	7	42	4	2
55	12	13	4	17
56	22	12	2	14
57	5	35	12	22
58	7	35	6	9
59	2	13	3	7
60	16	46	6	9
61	3	24	12	13
62	7	12	2	11
63	2	21	8	19
64	50	36	4	13
65	4	7	8	9
66	42	14	8	24
67	23	52	18	4
68	4	29	19	8
69	3	36	5	5
70	5	12	5	17
71	26	17	9	8
72	1	13	3	7
73	5	34	8	8
74	24	10	4	36
75	4	30	6	24
76	7	44	20	18
77	9	23	0	37
78	28	8	9	19
79	13	9	5	5
80	15	12	14	23
81	10	28	15	18
82	7	23	17	16
83	12	31	21	16
84	7	35	14	4
85	13	25	7	28
86	9	17	8	8
87	35	23	4	20
88	4	8		20
89	3	13		20
90	3	29		6
91	4			16

## Sheet: Exhibit7
Record	Resident Review	Resident & Patient	Teach	Resident & Attending
1	1	30	15	11
2	11	19	2	11
3	17	39	2	57
4	9	23	0	10
5	4	17	5	3
6	4	17	11	2
7	9	4	7	5
8	1	33	9	7
9	9	24	6	5
10	2	7	11	11
11	1	8	3	5
12	1	10	4	11
13	4	27	12	13
14	20	7	1	10
15	4	23	3	3
16	2	16	0	12
17	12	4	2	4
18	4	17	2	3
19	32	28	5	3
20	4	13	4	10
21	32	18	3	11
22	1	3	6	2
23	15	4	5	9
24	9	12	2	3
25	2	5	0	7
26	2	30	1	4
27	47	22	7	9
28	3	19	7	2
29	27	9	5	6
30	15	5	1	2
31	4	9	1	2
32	2	16	1	2
33	3	22	2	6
34	55	14	1	9
35	8	4	8	8
36	5	4	15	8
37	4	10	6	12
38	3	16	2	11
39	1	23	19	5
40	16	8	3	17
41	54	3	3	20
42	2	14	15	2
43	4	13	6	17
44	2	5	1	5
45	9	14	13	10
46	8	6	9	23
47	1	33	2	10
48	3	20	10	11
49	13	18	1	8
50	2	17	1	20
51	1	5	1	5
52	4	6	3	9
53	3	8	3	10
54	9	13	2	13
55	22	10	7	34
56	6	24	2	7
57	10	11	7	8
58	4	3	4	8
59	6	11	6	13
60	3	5	5	5
61	20	3	4	8
62	14	13	9	7
63	11	4	16	2
64	10	9	2	5
65	10	19	3	12
66	9	13	0	3
67	6	10	4	10
68	2	16	9	5
69	3	10	11	3
70	18	9	2	5
71	1	11	2	12
72	34	24	6	8
73	5	10	3	13
74	26	11	1	7
75	28	10	2	2
76	14	14	5	3
77	10	5	4	25
78	4	5	5	11
79	1	11	6	13
80	6	7	1	14
81	5	17	3	4
82	10	7	10	9
83	9	20	7	17
84	9	7	2	6
85	5	3	4	2
86	6	7	5	2
87	5	5	6	6
88	4	17	7	11
89	1	14	6	12
90	19	16	8	2
91	5	5	10	7
92	10	13	1	56
93	7	8	4	11
94	4	12	7	3
95	8	24	5	5
96	5	25	4	5
97	5	8	3	9
98	2	8	10	3
99	2	3	6	7
100	6	8	14	10
